# Supplementary material
Source: PubMed Central journal article supplement (PMC3343309)
Supplement: cr2010154x1.pdf [file cr2010154x1.pdf]

**Fig. S1**

**A**

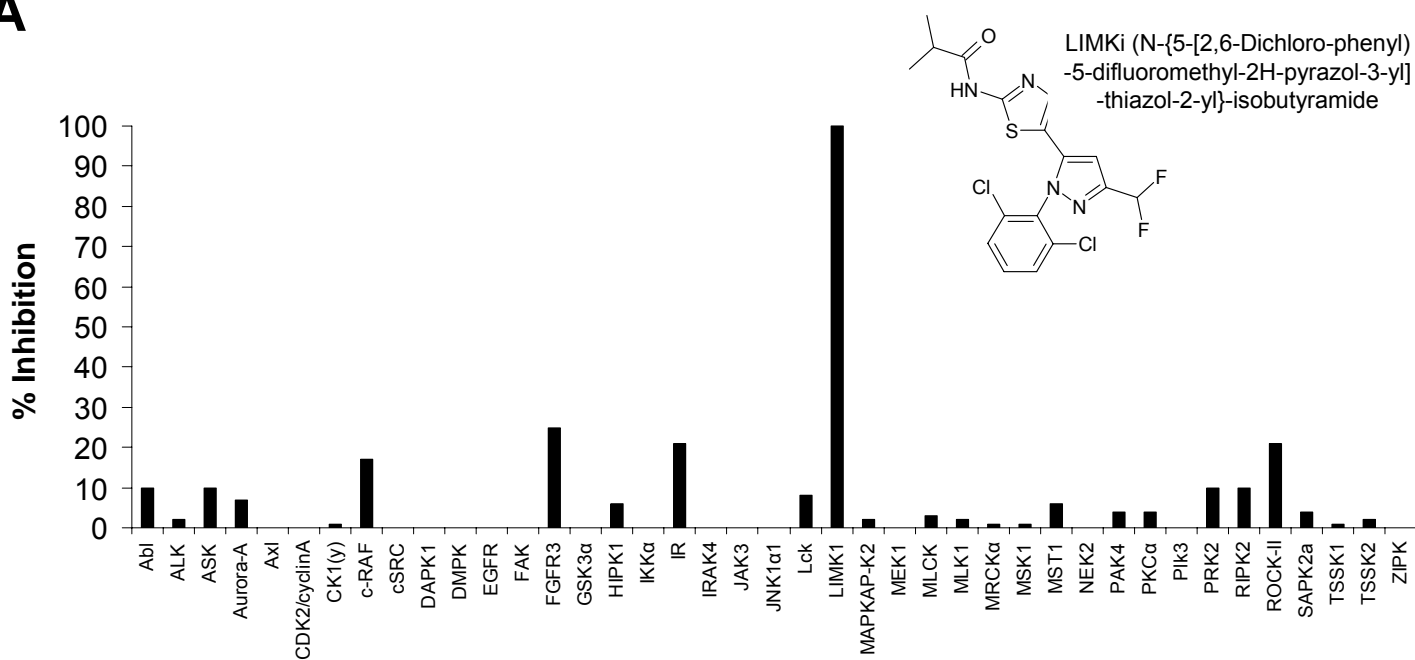

**B**

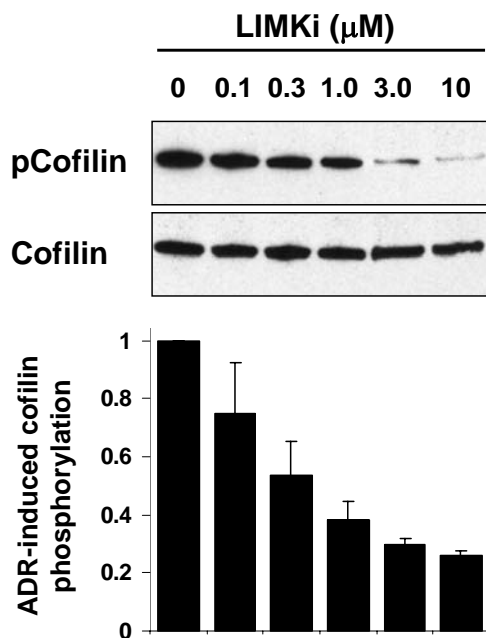

**Figure S1** LIMK inhibition by a selective small-molecule inhibitor. **(A)** LIMK inhibitor (LIMKi) selectivity against a panel of human kinases. Percentage inhibition of *in vitro* kinase activity in the presence of 1  $\mu$ M LIMKi, assayed at the corresponding ATP  $K_m$  for each kinase determined by the Millipore kinase profiler service. **(B)** Dose-dependent inhibition of adriamycin-induced cofilin phosphorylation. Increasing concentrations of LIMKi produced corresponding inhibition of cofilin phosphorylation. Representative quantitative western blot showing lysates of MCF-7 cells treated with Adr (0.2  $\mu$ g/ml) in the presence of LIMKi at the concentrations indicated for 24 hours. Graph represents mean  $\pm$  SEM (n=3).
