# Supplementary material
Source: PubMed Central journal article supplement (PMC3343309)
Supplement: cr2010154x2.pdf [file cr2010154x2.pdf]

**Fig. S2**

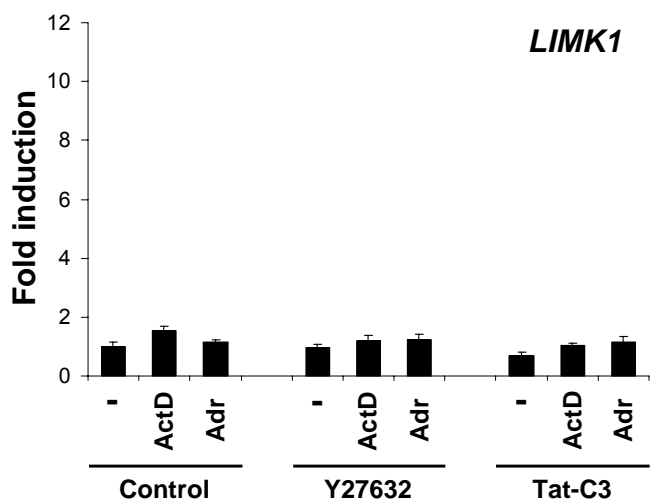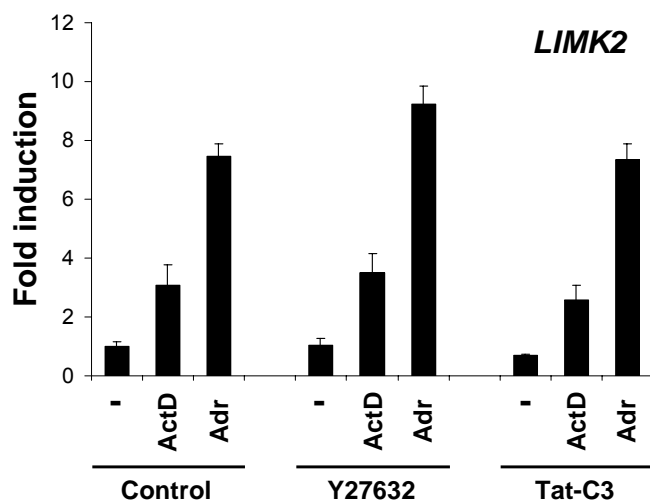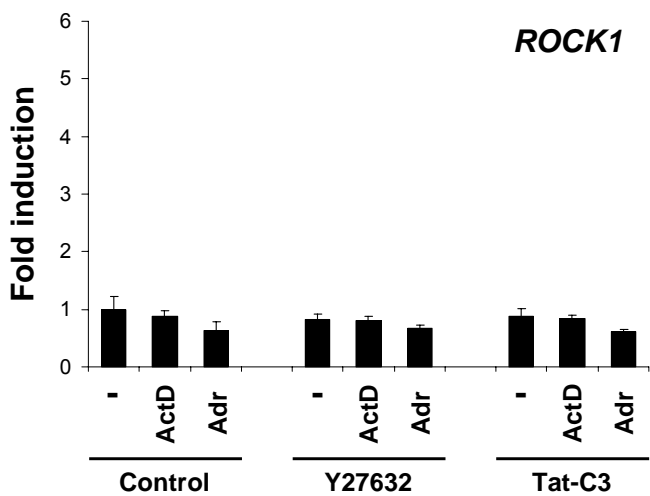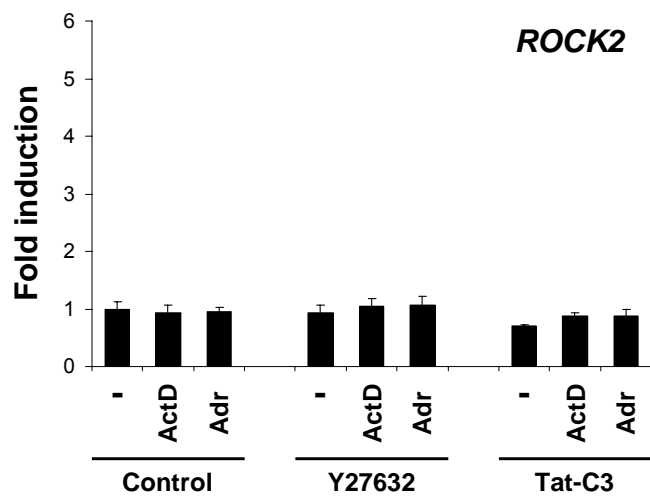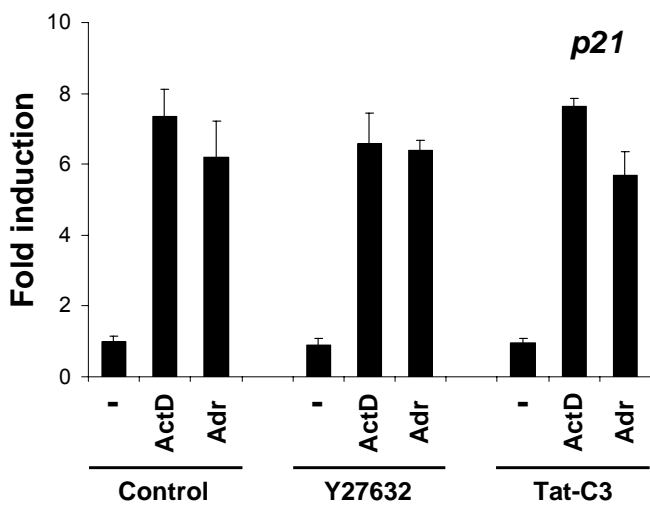

**Figure S2** Rho or ROCK inhibition does not affect *LIMK2* mRNA induction by genotoxic stress. MCF-7 cells were treated with ActD (2 nM) or Adr (0.2 µg/ml) in the presence or absence of Y-27632 (10 µM) or Tat-Myc-C3 (80 µg/ml) for 24 hours. *LIMK1*, *LIMK2*, *ROCK1*, *ROCK2* and *p21* mRNA levels were assayed by qPCR. Rho or ROCK inhibition does not affect either *LIMK2* or *p21* mRNA levels induced by genotoxic stress. Data are presented as mean fold induction ± SEM (n=3) relative to untreated control.
