# Supplementary material
Source: PubMed Central journal article supplement (PMC3343309)
Supplement: cr2010154x3.pdf [file cr2010154x3.pdf]

**Fig. S3**

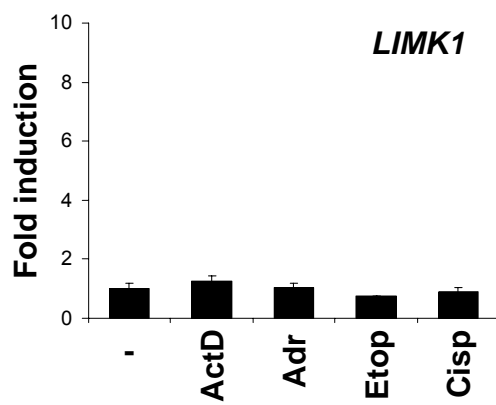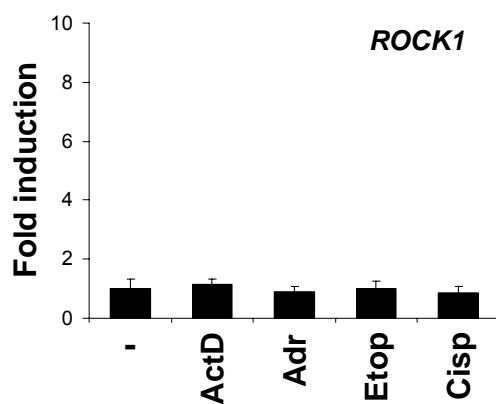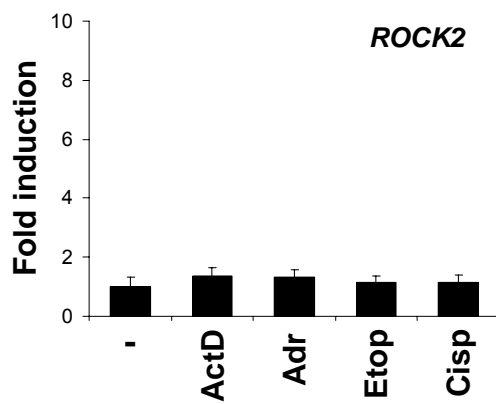

**Figure S3** Genotoxic stress does not induce *LIMK1*, *ROCK1* or *ROCK2* mRNA. MCF-7 cells were treated with ActD (2 nM), Adr (0.2  $\mu$ g/ml), etoposide (Etop) (20  $\mu$ M) or cisplatin (Cisp) (25  $\mu$ M) for 24 hours. Levels of *LIMK1*, *ROCK1* and *ROCK2* mRNA were analyzed by qPCR. Data are represented as mean fold induction  $\pm$  SEM (n=3) relative to vehicle control.
