# Supplementary material
Source: PubMed Central journal article supplement (PMC3343309)
Supplement: cr2010154x4.pdf [file cr2010154x4.pdf]

**Fig. S4**

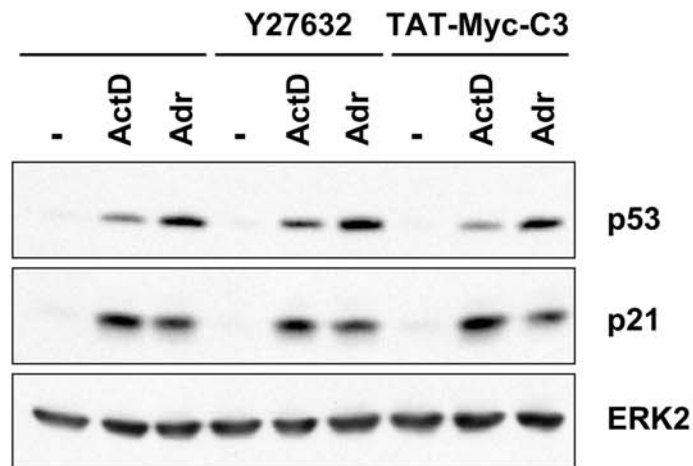

**Figure S4** Rho or ROCK inhibition do not affect p53 activation. MCF-7 cells were treated with ActD (2 nM) or Adr (0.2  $\mu$ g/ml) in the presence or absence of Y-27632 (10  $\mu$ M) or Tat-C3 (80  $\mu$ g/ml) for 24 hours. Whole cell lysates were immunoblotted with antibodies against p53 and p21. ERK2 immunoblotting revealed equivalent protein loading.
