# Supplementary material
Source: PubMed Central journal article supplement (PMC3343309)
Supplement: cr2010154x6.pdf [file cr2010154x6.pdf]

**Fig. S6**

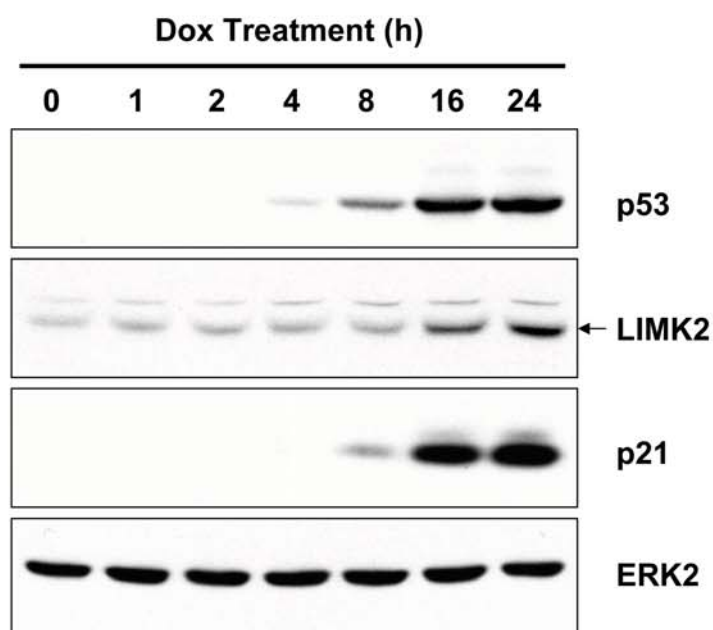

**Figure S6** Time course of LIMK2 induction following p53 activation. Saos-2 Tet-On wt-p53 cells were treated with doxycycline (Dox; 1  $\mu$ g/ml) for between 0 and 24 hours. LIMK2, p53 and p21 protein expression were assessed by western blotting. ERK2 immunoblotting revealed equivalent protein loading.
