# Supplementary material
Source: PubMed Central journal article supplement (PMC3343309)
Supplement: cr2010154x7.pdf [file cr2010154x7.pdf]

**A**

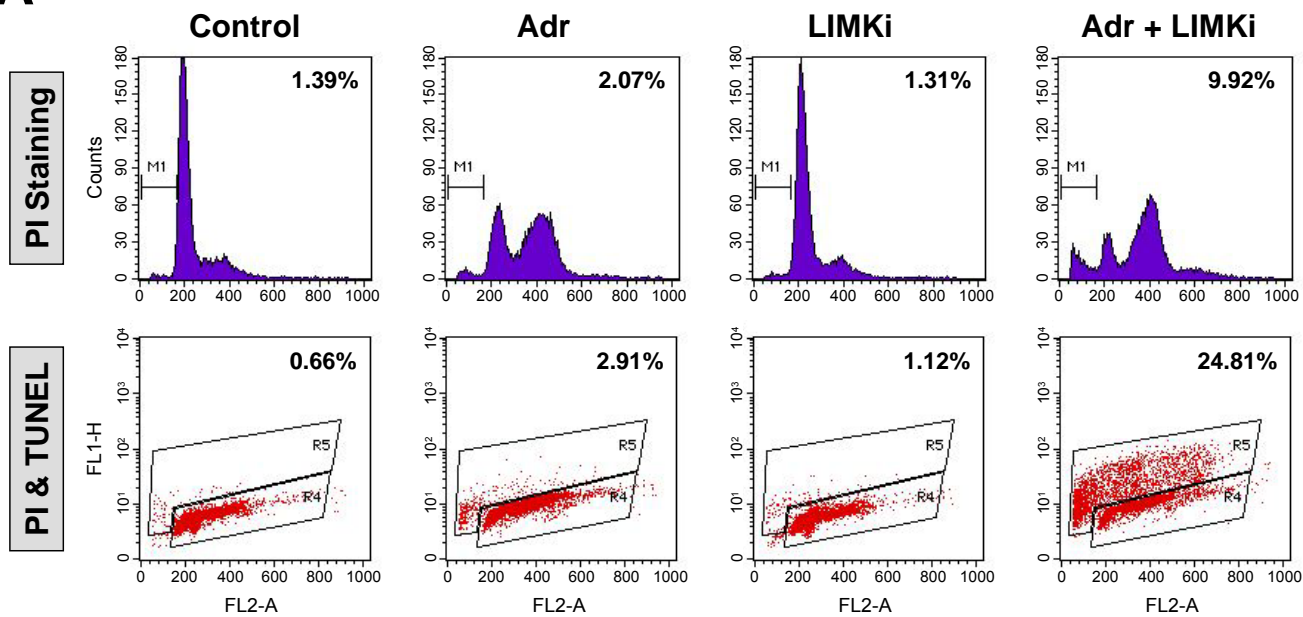

**B**

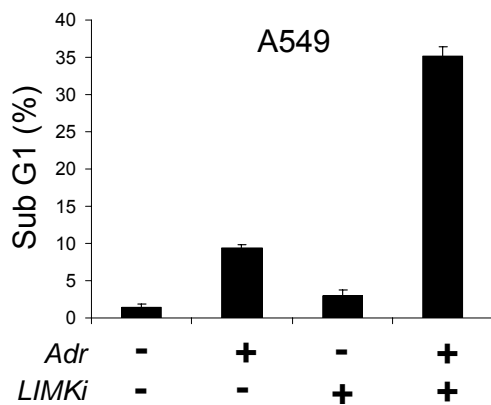

**C**

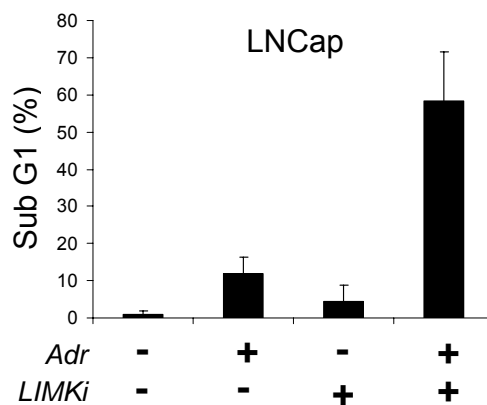

**D**

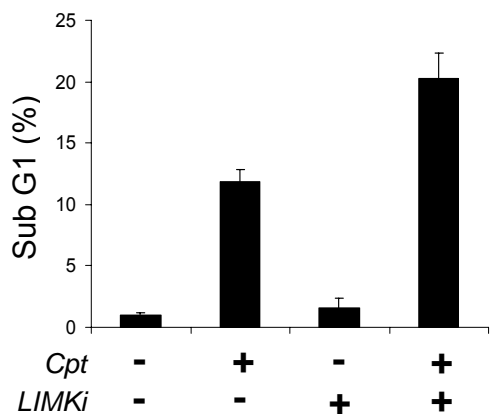

**E**

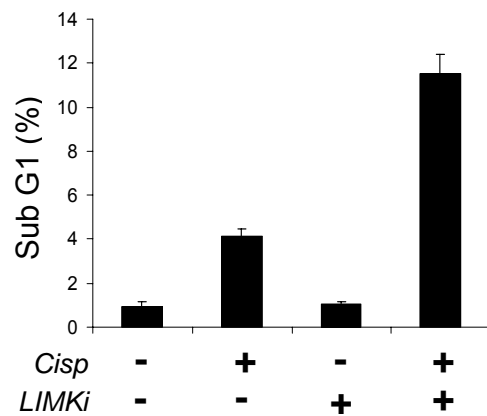

**Figure S7** LIMK inhibition synergizes with DNA-damaging agents to promote apoptosis. MCF-7 cells were treated with **(A)** Adr (0.2  $\mu\text{g/ml}$ ) in the presence or absence of LIMKi (10  $\mu\text{M}$ ) for 72 hours. Adherent and non-adherent cells were collected and processed for PI/TUNEL staining. Representative FACS profiles of PI staining of DNA content and TUNEL staining are shown. Percentages of apoptotic cells as measured by sub-G1 DNA content (M1 population) or TUNEL-positive cells (R5 population) are shown in each panel. **(B)** A549 cells and **(C)** LNCaP cells were treated with Adr (0.4  $\mu\text{g/ml}$  and 0.3  $\mu\text{g/ml}$ , respectively) in the presence or absence of LIMKi (10  $\mu\text{M}$ ) for 72 hours. MCF-7 cells treated with **(D)** 0.6  $\mu\text{M}$  camptothecin (Cpt) or **(E)** 100  $\mu\text{M}$  cisplatin (Cisp) in the presence or absence of LIMKi (10  $\mu\text{M}$ ) for 72 hours. Adherent and non-adherent cells were collected and processed for PI staining. Apoptotic cell death is shown as the mean percentage sub-G1 cells  $\pm$  SEM (n=3-6).
