# Supplementary material
Source: PubMed Central journal article supplement (PMC3343309)
Supplement: cr2010154x8.pdf [file cr2010154x8.pdf]

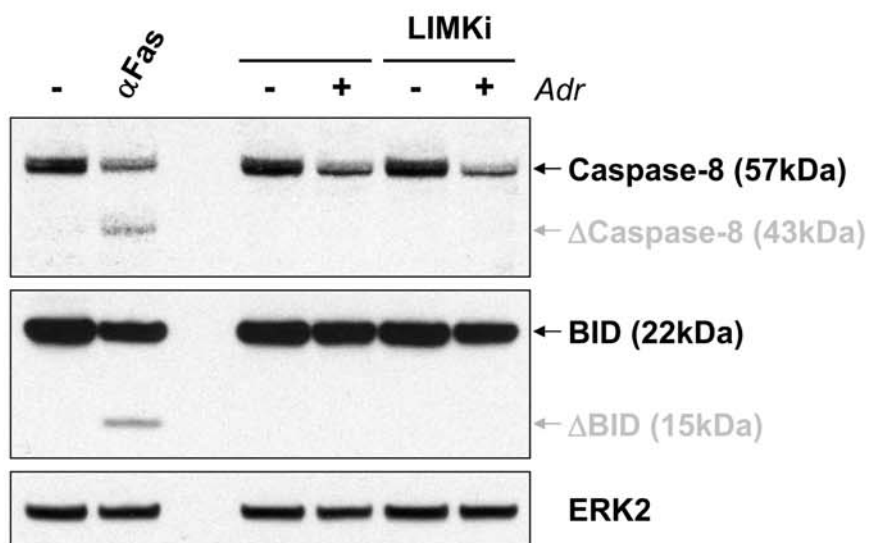

**Figure S8** Combination of adriamycin with LIMKi does not activate the extrinsic apoptosis pathway. MCF-7 cells were treated with ADR (0.2  $\mu\text{g/ml}$ ) in the presence or absence of LIMKi (10  $\mu\text{M}$ ) for 48 hours. As a positive control for activation of the extrinsic apoptosis pathway, MCF-7 cells were treated with and without activating Fas antibody (50  $\mu\text{g/ml}$ ) for 48 hours. Adherent and non-adherent cells were collected and combined. Immunoblot analysis of whole cell lysates was carried out using antibodies against Caspase-8 and BID which recognize both full-length and caspase-cleaved ( $\Delta$ ) proteins. Equivalent protein loading was confirmed by ERK2 immunoblotting.
