# Supplementary material
Source: PubMed Central journal article supplement (PMC3343309)
Supplement: cr2010154x9.pdf [file cr2010154x9.pdf]

### Supplementary Table 1 Chromatin immunoprecipitation primers

| Name                       | Sequence                      |
|----------------------------|-------------------------------|
| <i>RHOC</i> BS1 (Forward)  | 5'-TGCTAGACAACGGGGGAAG-3'     |
| <i>RHOC</i> BS1 (Reverse)  | 5'-TGCTTGGGACACTACACAGC-3'    |
| <i>RHOC</i> BS2 (Forward)  | 5'-CTAACCCATCGAGGGAGACC-3'    |
| <i>RHOC</i> BS2 (Reverse)  | 5'-CGTATTGGGGATTTGAGGAA-3'    |
| <i>LIMK2a</i> BS (Forward) | 5'-GCTTAAGACGTACAGGGTCTGG-3'  |
| <i>LIMK2a</i> BS (Reverse) | 5'-TGGTCTATCTTGTTTCCTTGCTG-3' |
| <i>LIMK2b</i> BS (Forward) | 5'-ATAGCTGGCTGTGCCCTTTA-3'    |
| <i>LIMK2b</i> BS (Reverse) | 5'-CACCAGAACACACCCTCCTT-3'    |
| <i>p21</i> BS (Forward)    | 5'-ACCTTTCACCATTCCCCTAC-3'    |
| <i>p21</i> BS (Reverse)    | 5'-GCCCAAGGACAAAATAGCCA-3'    |
